# Supplementary material for: Validation of Multiplex PCR and Serology Detecting Helicobacter Species in Mice
Source: MDPI journal article supplement (doi:10.3390/microorganisms11020249), 2023-01-18
Supplement: s1 [file s1]

## Supplement

**Supplementary Table S1: *H. hepaticus* and *H. bilis* proteins included in multiplex serology and their amino acid identities with proteins of related *Helicobacter* species**

| Protein                             | Uniprot ID | Predicted function | Amino acid identity (%) <sup>a</sup> to proteins of |                 |                      |                  |
|-------------------------------------|------------|--------------------|-----------------------------------------------------|-----------------|----------------------|------------------|
|                                     |            |                    | <i>H. hepaticus</i>                                 | <i>H. bilis</i> | <i>H. typhlonius</i> | <i>H. pylori</i> |
| <i>H. hepaticus</i> (ATCC51449)     |            |                    |                                                     |                 |                      |                  |
| HH1201                              | Q7U317     | GroEL              | Ref                                                 | 83              | 93                   | 84               |
| HH0407                              | Q93PJ5     | UreaseA            | Ref                                                 | 78              | -                    | 68               |
| HH0713                              | Q7VI95     | Lipoprotein        | Ref                                                 | 54              | 78                   | 53               |
| HH0966                              | Q7VHK1     | -                  | Ref                                                 | 31              | 75                   | 49               |
| HH1446                              | Q9RFY6     | CdtA               | Ref                                                 | 43              | 60                   | -                |
| HH0435                              | Q9X691     | OmpA-like          | Ref                                                 | 49              | 79                   | 49               |
| HH0243                              | Q7VJK0     | -                  | Ref                                                 | 92              | -                    | -                |
| <i>H. bilis</i><br>(ATCC43879/WiWa) |            |                    |                                                     |                 |                      |                  |
| HRAG_00845                          | C3XFJ9     | GroEL              | 83                                                  | Ref             | 82                   | 82               |
| HRAG_01470                          | C3XHC4     | UreaseA            | 78                                                  | Ref             | -                    | 68               |
| HRAG_01504                          | C3XHF8     | Lipoprotein        | 57                                                  | Ref             | 55                   | 54               |
| HRAG_01298                          | C3XGV2     | -                  | 43                                                  | Ref             | 46                   | -                |
| HRAG_01818                          | C3XIE3     | CdtA               | 44                                                  | Ref             | 47                   | -                |
| P167C                               | Q71SN5     | -                  | -                                                   | Ref             | -                    | -                |
| P167D                               | Q71SN5     | -                  | -                                                   | Ref             | -                    | -                |

<sup>a</sup>as determined by BlastP<sup>31</sup>; -, No homologous protein found

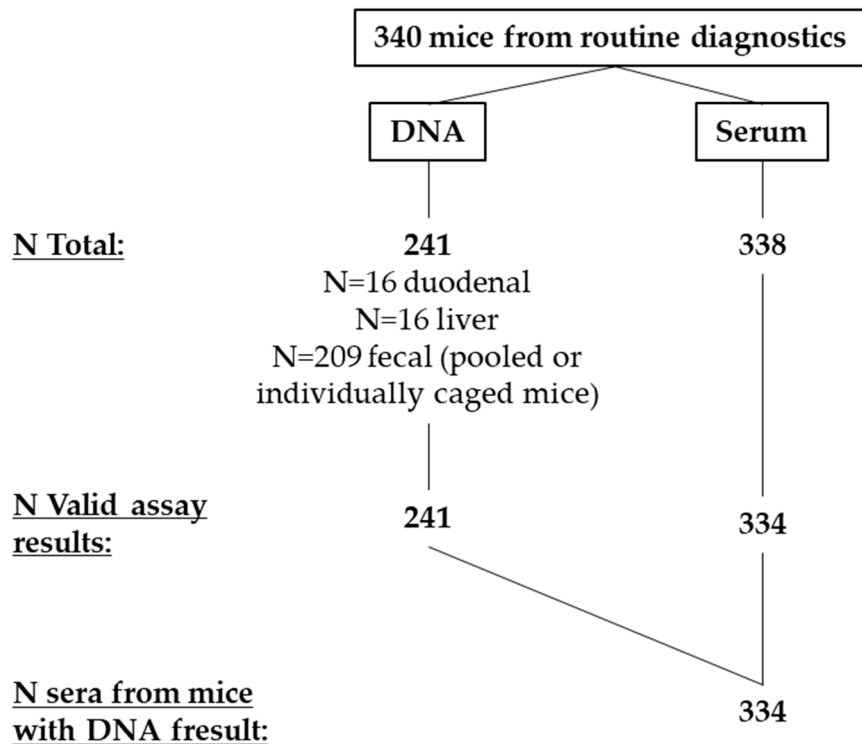

**Supplementary Figure S1: Murine samples to assess sensitivity and specificity of the newly developed *Helicobacter* multiplex DNA finder and *Helicobacter* multiplex serology.** Samples from n= 340 colony animals and sentinel mice (different transgenic strains, CD1, BL/6, NMRI and Mastomys coucha), which were tested in the frame of the routine health monitoring of rodents at the DKFZ, were used to assess sensitivity and specificity of the newly developed *Helicobacter* multiplex DNA finder and *Helicobacter* multiplex serology. The samples for PCR analysis comprised duodenal and liver samples from n=16 mice, as well as n=209 fecal samples (n=109 from individual mice and n=100 pooled fecal samples from two to three mice). Concurrent serum samples were available from n=338 mice (Figure 1). Valid PCR and serology assay results were available for n=241 and n=334 of the samples, respectively, resulting in concurrent PCR and serology data for n=334 mice.

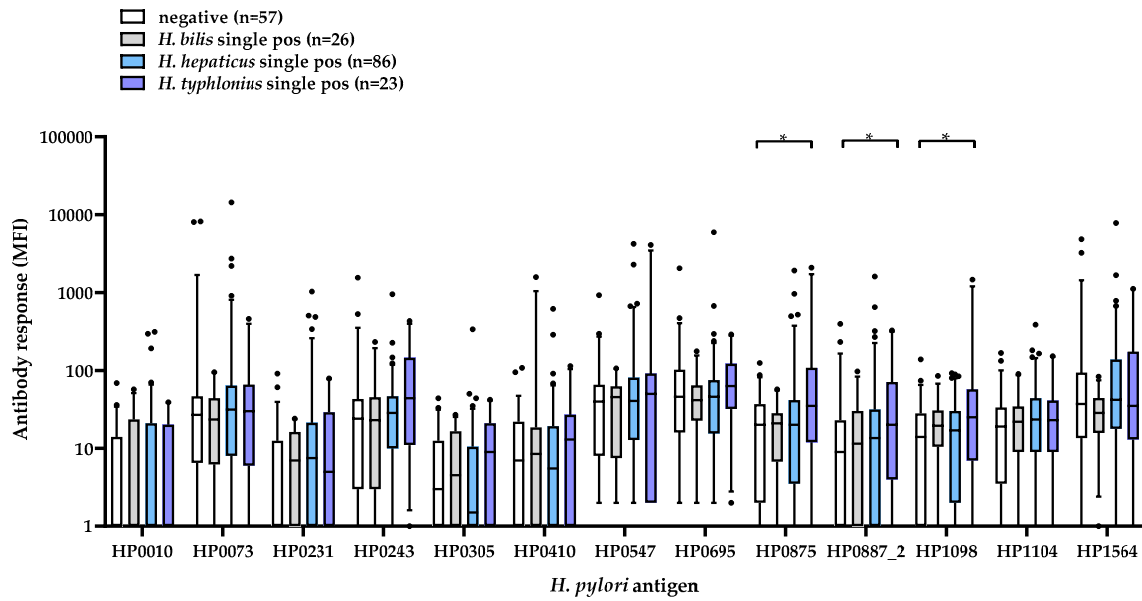

**Supplementary Figure S2: Antibody responses [MFI] to *H. pylori* antigens by Helicobacter multiplex DNA finder result in murine samples taken at routine diagnostics.** Boxes represent 25th to 75th and whiskers the 5th to 95th percentile, solid lines show the median. Dots represent data points lying outside the 5th and 95th percentiles, respectively. Wilcoxon-Mann-Whitney test was applied to compare continuous antibody responses [MFI] individual DNA-positive groups to the DNA-negative group: \*p-value < 0.05
